# Supplementary material for: Carcinogenic Chemicals in Occupational Settings: A Tool for Comparison and Translation between Different Classification Systems
Source: MDPI journal article supplement (doi:10.3390/hygiene4010007), 2024-02-21
Supplement: s1 [file s1]

## SUPPLEMENTARY DATA

**Table S1. Differences between the classification categories “NO” and “n.a.” for the classifications**

|             | Source               | Description                                   | Consulted documentation | Reference   |
|-------------|----------------------|-----------------------------------------------|-------------------------|-------------|
| <b>NO</b>   | NTP, NIOSH, IARC     | Chemical not classified as carcinogen         | Specific                | 15,17,20    |
| <b>n.a.</b> | ECHA-CLP, EPA, ACGIH | Classification for chemicals is not available | Unspecific              | 11,12,14,16 |

**IARC:** International Agency for Research on Cancer; **NTP:** National Toxicology Program (United States); **NIOSH:** National Institute for Occupational Safety and Health (United States); **EPA:** Environmental Protection Agency (United States); **ACGIH:** American Conference of Governmental Industrial Hygienists (United States); **n.a.:** not available

### PART 1: THE DATABASE

The database is an Excel file freely available at the following link: <https://www.dropbox.com/scl/fi/fccr7dp5snfe71e50jva3/CARCINOSYS-Database.xlsx?rlkey=fozuomf30mntbkhfjmn3z3dv&dl=0>

The database is composed by 4 sheets.

Sheet 1: Disclaimer

Sheet 2: Table with the comparison between the CoCs consulted and their conversion in the CLP-COC.

Sheet 3: Glossary and legend.

Sheet 4: The tool.

The tool is structured in 11 columns and 84 rows. Columns report the substance information, its classifications (reference CLP, IARC, EPA, ACGIH, NTP, IARC CoCs) and some note concerning annotations and links. There are 83 substances.

The Table S2 reports the columns information of the tool.

**Table S2 . Columns information of the tool.**

| <b>Column</b> | <b>Column name</b>                                 | <b>Column information</b>                          |
|---------------|----------------------------------------------------|----------------------------------------------------|
| A             | ID                                                 | Identifier number                                  |
| B             | CAS                                                | Chemical Abstract Service Registry Number          |
| C             | CLP NAME                                           | Chemical name used in the CLP CoC                  |
| D             | CLP classification                                 | CLP chemical classification                        |
| E             | IARC (converted in CLP-equivalent classification)  | IARC chemical classification converted in CLP CoC  |
| F             | EPA (converted in CLP-equivalent classification)   | EPA chemical classification converted in CLP CoC   |
| G             | ACGIH (converted in CLP-equivalent classification) | ACGIH chemical classification converted in CLP CoC |
| H             | NTP (converted in CLP-equivalent classification)   | NTP chemical classification converted in CLP CoC   |
| I             | NIOSH (converted in CLP-equivalent classification) | NIOSH chemical classification converted in CLP CoC |
| J             | Note                                               | Abbreviated notes                                  |
| K             | Added documentation                                | Links and other                                    |

PART 2: ORIGINAL CoCs.

Table S3. Original CLP, IARC, EPA, ACGIH, NTP and NIOSH classification.

| CAS                                                                                                   | CLP Name                                                                                         | CLP | IARC | EPA                                 | ACGIH | NTP                                            | NIOSH |
|-------------------------------------------------------------------------------------------------------|--------------------------------------------------------------------------------------------------|-----|------|-------------------------------------|-------|------------------------------------------------|-------|
| 70-25-7                                                                                               | 1-methyl-3-nitro-1-nitrosoguanidine                                                              | 1B  | 2A   | na                                  | na    | Reasonably Anticipated To Be Human Carcinogens | NO    |
| 96-12-8                                                                                               | 1,2-dibromo-3-chloropropane                                                                      | 1B  | 2B   | na                                  | na    | Reasonably Anticipated To Be Human Carcinogens | C     |
| 1746-01-6                                                                                             | 2,3,7,8-tetrachlorodibenzo[b,e][1,4]dioxin                                                       | NO  | 1    | na                                  | na    | Known To Be Human Carcinogens                  | C     |
| 71-43-2                                                                                               | benzene                                                                                          | 1A  | 1    | Carcinogenic to Humans              | A1    | Known To Be Human Carcinogens                  | C     |
| 542-88-1                                                                                              | bis(chloromethyl) ether;<br>oxybis(chloromethane)                                                | 1A  | 1    | Carcinogenic to Humans              | A1    | Known To Be Human Carcinogens                  | C     |
| 12001-28-4;<br>132207-32-0;<br>12172-73-5;<br>77536-66-4;<br>77536-68-6;<br>77536-67-5;<br>12001-29-5 | Asbestos<br>[actinolite, amosite (grunerite), antofillite,<br>crisotilo, crocidolite, tremolite] | 1A  | 1    | Carcinogenic to Humans              | A1    | Known To Be Human Carcinogens                  | C     |
| 75-01-4                                                                                               | vinyl chloride; chloroethylene                                                                   | 1A  | 1    | Carcinogenic to Humans              | A1    | Known To Be Human Carcinogens                  | C     |
| 1336-36-3                                                                                             | polychlorobiphenyls; PCB                                                                         | NO  | 1    | Likely to be Carcinogenic to Humans | na    | reasonably Anticipated To Be Human Carcinogens | NO    |
| 106-89-8                                                                                              | 1-chloro-2,3-epoxypropane;<br>epichlorhydrin                                                     | 1B  | 2A   | Likely to be Carcinogenic to Humans | A3    | Reasonably Anticipated To Be Human Carcinogens | C     |
| 50-00-0                                                                                               | formaldehyde                                                                                     | 1B  | 1    | Likely to be Carcinogenic to Humans | A1    | Known To Be Human Carcinogens                  | C     |
| 50-32-8                                                                                               | benzo[a]pyrene; benzo[def]chrysene                                                               | 1B  | 1    | Carcinogenic to Humans              | A2    | Reasonably Anticipated To Be Human Carcinogens | NO    |
| 75-21-8                                                                                               | ethylene oxide;<br>oxirane                                                                       | 1B  | 1    | Carcinogenic to Humans              | A2    | Known To Be Human Carcinogens                  | C     |

|            |                                                                                                                                                                                             |    |    |                                     |    |                                                |    |
|------------|---------------------------------------------------------------------------------------------------------------------------------------------------------------------------------------------|----|----|-------------------------------------|----|------------------------------------------------|----|
| 127-18-4   | tetrachloroethylene                                                                                                                                                                         | 2  | 2A | Likely to be Carcinogenic to Humans | A3 | Reasonably Anticipated To Be Human Carcinogens | C  |
| 1327-53-3  | diarsenic trioxide; arsenic trioxide                                                                                                                                                        | 1A | 1  | Carcinogenic to Humans              | A1 | Known To Be Human Carcinogens                  | C  |
| 1303-28-2  | diarsenic pentaoxide; arsenic pentoxide; arsenic oxide                                                                                                                                      | 1A | 1  | Carcinogenic to Humans              | A1 | Known To Be Human Carcinogens                  | C  |
| na         | arsenic acid and its salts with the exception of those specified elsewhere in this Annex                                                                                                    | 1A | 1  | Carcinogenic to Humans              | A1 | Known To Be Human Carcinogens                  | C  |
| 107-06-2   | 1,2-dichloroethane; ethylene dichloride                                                                                                                                                     | 1B | 2B | Likely to be Carcinogenic to Humans | A4 | Reasonably Anticipated To Be Human Carcinogens | C  |
| 101-14-4   | 2,2'-dichloro-4,4'-methylenedianiline; 4,4'-methylene bis(2-chloroaniline)                                                                                                                  | 1B | 1  | na                                  | A2 | Reasonably Anticipated To Be Human Carcinogens | C  |
| 24613-89-6 | dichromium tris(chromate); chromium III chromate; chromic chromate                                                                                                                          | 1B | 1  | Carcinogenic to Humans              | A1 | Known To Be Human Carcinogens                  | C  |
| 7789-06-2  | strontium chromate                                                                                                                                                                          | 1B | 1  | Carcinogenic to Humans              | A1 | Known To Be Human Carcinogens                  | C  |
| 11103-86-9 | zinc chromates including zinc potassium chromate                                                                                                                                            | 1A | 1  | Carcinogenic to Humans              | A1 | Known To Be Human Carcinogens                  | C  |
| 98-87-3    | $\alpha,\alpha$ -dichlorotoluene; benzylidene chloride; benzal chloride                                                                                                                     | 2  | 2A | na                                  | na | na                                             | NO |
| 100-44-7   | $\alpha$ -chlorotoluene; benzyl chloride                                                                                                                                                    | 1B | 2A | Likely to be Carcinogenic to Humans | A3 | na                                             | NO |
| 98-88-4    | benzoyl chloride                                                                                                                                                                            | NO | 2A | na                                  | A4 | na                                             | NO |
| 53-70-3    | dibenz[a,h]anthracene                                                                                                                                                                       | 1B | 2A | Likely to be Carcinogenic to Humans | na | Reasonably Anticipated To Be Human Carcinogens | NO |
| 191-30-0   | dibenzo[def,p]chrysene; dibenzo[a,l]pyrene                                                                                                                                                  | 1B | 2A | na                                  | na | Reasonably Anticipated To Be Human Carcinogens | NO |
| 27208-37-3 | cyclopenta [c,d] pyrene                                                                                                                                                                     | na | 2A | na                                  | na | na                                             | NO |
| 90640-80-5 | anthracene oil; [A complex combination of polycyclic aromatic hydrocarbons obtained from coal tar having an approximate distillation range of 300 °C to 400 °C (572 °F to 752 °F). Composed | 1B | 3  | D (non cancerogenic)                | na | na                                             | NO |

|              |                                                                                                                                                                                                                                                                                                   |    |    |                                     |    |                                                |    |
|--------------|---------------------------------------------------------------------------------------------------------------------------------------------------------------------------------------------------------------------------------------------------------------------------------------------------|----|----|-------------------------------------|----|------------------------------------------------|----|
|              | primarily of phenanthrene, anthracene and carbazole.]                                                                                                                                                                                                                                             |    |    |                                     |    |                                                |    |
| 8001-58-9    | creosote; [The distillate of coal tar produced by the high temperature carbonization of bituminous coal. It consists primarily of aromatic hydrocarbons, tar acids and tar bases.]                                                                                                                | 1B | 2A | Likely to be Carcinogenic to Humans | na | na                                             | C  |
| 12510-42-8   | erionite                                                                                                                                                                                                                                                                                          | 1A | 1  | na                                  | na | Known To Be Human Carcinogens                  | NO |
| 650-017-00-8 | RCF-Refractory Ceramic Fibres                                                                                                                                                                                                                                                                     | 1B | 2B | Likely to be Carcinogenic to Humans | A2 | Reasonably Anticipated To Be Human Carcinogens | NO |
| 65996-93-2   | pitch, coal tar, high-temp.,; [The residue from the distillation of high temperature coal tar. A black solid with an approximate softening point from 30 °C to 180 °C (86 °F to 356 °F). Composed primarily of a complex mixture of three or more membered condensed ring aromatic hydrocarbons.] | 1A | 1  | na                                  | A1 | na                                             | C  |
| 96-18-4      | 1,2,3-trichloropropane                                                                                                                                                                                                                                                                            | 1B | 2A | Likely to be carcinogenic to humans | na | Reasonably Anticipated To Be Human Carcinogens | C  |
| 121-14-2     | 2,4-dinitrotoluene [1]<br>dinitrotoluene [2]                                                                                                                                                                                                                                                      | 1B | 2B | na                                  | na | na                                             | C  |
| 106-99-0     | 1,3-butadiene; buta-1,3-diene                                                                                                                                                                                                                                                                     | 1A | 1  | Carcinogenic to humans              | A2 | Known To Be Human Carcinogens                  | NO |
| 106-97-8     | butane (containing ≥ 0,1 % butadiene (203-450-8))                                                                                                                                                                                                                                                 | 1A | NO | na                                  | na | na                                             | NO |
| 75-28-5      | isobutane (containing ≥ 0,1 % butadiene (203-450-8))                                                                                                                                                                                                                                              | 1A | NO | na                                  | na | na                                             | NO |
| 101-77-9     | 4,4'-diaminodiphenylmethane; 4,4'-methylenedianiline                                                                                                                                                                                                                                              | 1B | 2B | na                                  | A3 | Reasonably Anticipated To Be Human Carcinogens | NO |
| 79-06-1      | acrylamide; prop-2-enamide                                                                                                                                                                                                                                                                        | 1B | 2A | Likely to be carcinogenic to humans | A2 | Reasonably Anticipated To Be Human Carcinogens | C  |
| 593-60-2     | bromoethylene                                                                                                                                                                                                                                                                                     | 1B | 2A | na                                  | A2 | Reasonably Anticipated To Be Human Carcinogens | C  |

|            |                                                                                                                                                                |           |    |                                     |    |                                                |    |
|------------|----------------------------------------------------------------------------------------------------------------------------------------------------------------|-----------|----|-------------------------------------|----|------------------------------------------------|----|
| 119-90-4   | 3,3'-dimethoxybenzidine; o-dianisidine                                                                                                                         | <b>1B</b> | 2B | na                                  | na | Reasonably Anticipated To Be Human Carcinogens | C  |
| 2425-06-1  | captafol (ISO); 1,2,3,6-tetrahydro-N-(1,1,2,2-tetrachloroethylthio)phthalimide                                                                                 | <b>1B</b> | 2A | na                                  | A3 | Reasonably Anticipated To Be Human Carcinogens | C  |
| 77-78-1    | dimethyl sulphate                                                                                                                                              | <b>1B</b> | 2A | Likely to be Carcinogenic to Humans | A3 | Reasonably Anticipated To Be Human Carcinogens | C  |
| 79-44-7    | dimethylcarbamoyl chloride                                                                                                                                     | <b>1B</b> | 2A | na                                  | A2 | Reasonably Anticipated To Be Human Carcinogens | C  |
| 75-02-5    | fluoroethylene                                                                                                                                                 | <b>1B</b> | 2A | na                                  | A2 | Reasonably Anticipated To Be Human Carcinogens | NO |
| 556-52-5   | 2,3-epoxypropan-1-ol; glycidol; oxiranemethanol                                                                                                                | <b>1B</b> | 2A | na                                  | A3 | Reasonably Anticipated To Be Human Carcinogens | NO |
| 96-09-3    | styrene oxide; (epoxyethyl)benzene; phenyloxirane                                                                                                              | <b>1B</b> | 2A | na                                  | A3 | Reasonably Anticipated To Be Human Carcinogens | NO |
| 79-01-6    | trichloroethylene; trichloroethene                                                                                                                             | <b>1B</b> | 1  | Carcinogenic to humans              | A2 | Known To Be Human Carcinogens                  | C  |
| 126-72-7   | tris(2,3-dibromopropyl) phosphate                                                                                                                              | <b>1B</b> | 2A | na                                  | na | Reasonably Anticipated To Be Human Carcinogens | NO |
| 7758-97-6  | lead chromate                                                                                                                                                  | <b>1B</b> | 1  | Carcinogenic to Humans              | A1 | Known To Be Human Carcinogens                  | C  |
| 1344-37-2  | lead sulfochromate yellow; C.I. Pigment Yellow 34; [This substance is identified in the Colour Index by Colour Index Constitution Number, C.I. 77603.]         | <b>1B</b> | 1  | Carcinogenic to Humans              | A1 | Known To Be Human Carcinogens                  | C  |
| 12656-85-8 | lead chromate molybdate sulfate red; C.I. Pigment Red 104; [This substance is identified in the Colour Index by Colour Index Constitution Number, C.I. 77605.] | <b>1B</b> | 1  | Carcinogenic to Humans              | A1 | Known To Be Human Carcinogens                  | C  |
| 1333-82-0  | chromium (VI) trioxide                                                                                                                                         | <b>1A</b> | 1  | Carcinogenic to Humans              | A1 | Known To Be Human Carcinogens                  | C  |
| na         | acids generated from chromium trioxide and their oligomers                                                                                                     | <b>1A</b> | 1  | Carcinogenic to Humans              | A1 | Known To Be Human Carcinogens                  | C  |
| na         | oligomers of chromic acid and dichromic acid                                                                                                                   | <b>1A</b> | 1  | Carcinogenic to Humans              | A1 | Known To Be Human Carcinogens                  | C  |
| 7738-94-5  | chromic acid                                                                                                                                                   | <b>1B</b> | 1  | Carcinogenic to Humans              | A1 | Known To Be Human Carcinogens                  | C  |

|                          |                                                                                            |           |    |                        |    |                                                |    |
|--------------------------|--------------------------------------------------------------------------------------------|-----------|----|------------------------|----|------------------------------------------------|----|
| 13530-68-2               | dichromic acid                                                                             | <b>1B</b> | 1  | Carcinogenic to Humans | A1 | Known To Be Human Carcinogens                  | C  |
| 10588-01-9,<br>7789-12-0 | sodium dichromate                                                                          | <b>1B</b> | 1  | Carcinogenic to Humans | A1 | Known To Be Human Carcinogens                  | C  |
| 7778-50-9                | potassium dichromate                                                                       | <b>1B</b> | 1  | Carcinogenic to Humans | A1 | Known To Be Human Carcinogens                  | C  |
| 7789-09-5                | ammonium dichromate                                                                        | <b>1B</b> | 1  | Carcinogenic to Humans | A1 | Known To Be Human Carcinogens                  | C  |
| 7789-00-6                | potassium chromate                                                                         | <b>1B</b> | 1  | Carcinogenic to Humans | A1 | Known To Be Human Carcinogens                  | C  |
| 7775-11-3                | sodium chromate                                                                            | <b>1B</b> | 1  | Carcinogenic to Humans | A1 | Known To Be Human Carcinogens                  | C  |
| 234-329-8                | potassium hydroxyoctaoxodizincatedichromate                                                | <b>1A</b> | 1  | Carcinogenic to Humans | A1 | Known To Be Human Carcinogens                  | C  |
| 49663-84-5               | pentazinc chromate octahydroxide                                                           | <b>1A</b> | 1  | Carcinogenic to Humans | A1 | Known To Be Human Carcinogens                  | C  |
| 95-53-4                  | o-toluidine; 2-aminotoluene                                                                | <b>1B</b> | 1  | na                     | A3 | Known To Be Human Carcinogens                  | C  |
| 95-69-2                  | 4-chloro-o-toluidine [1]<br>4-chloro-o-toluidine hydrochloride [2]                         | <b>1B</b> | 2A | na                     | na | Reasonably Anticipated To Be Human Carcinogens | NO |
| 92-87-5                  | benzidine; 1,1'-biphenyl-4,4'-diamine;<br>4,4'-diaminobiphenyl; biphenyl-4,4'-ylenediamine | <b>1A</b> | 1  | Carcinogenic to Humans | A1 | Known To Be Human Carcinogens                  | C  |
| 91-59-8                  | 2-naphthylamine                                                                            | <b>1A</b> | 1  | na                     | A1 | Known To Be Human Carcinogens                  | C  |
| 92-67-1                  | biphenyl-4-ylamine; xenylamine; 4-aminobiphenyl                                            | <b>1A</b> | 1  | na                     | A1 | Known To Be Human Carcinogens                  | C  |
| 12070-12-1               | tungsten carbide                                                                           | <b>NO</b> | 2A | na                     | A2 | Reasonably Anticipated To Be Human Carcinogens | NO |
| 7440-48-4                | cobalt                                                                                     | <b>1B</b> | 2A | na                     | A3 | Reasonably Anticipated To Be Human Carcinogens | NO |
| 7440-38-2                | arsenic                                                                                    | <b>1A</b> | 1  | Carcinogenic to Humans | A1 | Known To Be Human Carcinogens                  | C  |
| na                       | arsenic compounds, with the exception of those specified elsewhere in ANNEX VI CLP-ATP 18  | <b>na</b> | 1  | Carcinogenic to Humans | A2 | Known To Be Human Carcinogens                  | C  |

|                                |                                                                                                                           |           |    |                                     |          |                                                |    |
|--------------------------------|---------------------------------------------------------------------------------------------------------------------------|-----------|----|-------------------------------------|----------|------------------------------------------------|----|
| 7440-41-7                      | beryllium                                                                                                                 | <b>1B</b> | 1  | Likely to be Carcinogenic to Humans | A1       | Known To Be Human Carcinogens                  | C  |
| na                             | beryllium compounds with the exception of aluminium beryllium silicates, and with those specified elsewhere in this Annex | <b>1B</b> | 1  | Likely to be Carcinogenic to Humans | A2       | Known To Be Human Carcinogens                  | C  |
| 7440-43-9                      | cadmium (pyrophoric)                                                                                                      | <b>1B</b> | 1  | Likely to be Carcinogenic to Humans | A2       | Known To Be Human Carcinogens                  | NO |
| 7440-43-9 [1]<br>1306-19-0 [2] | cadmium (non-pyrophoric) [1]<br>cadmium oxide (non-pyrophoric) [2]                                                        | <b>1B</b> | 1  | Likely to be Carcinogenic to Humans | A2       | Known To Be Human Carcinogens                  | NO |
| 7440-02-0                      | nickel                                                                                                                    | <b>2</b>  | 2B | non cancer                          | A5       | Reasonably Anticipated To Be Human Carcinogens | C  |
| 13463-39-3                     | tetracarbonylnickel; nickel tetracarbonyl                                                                                 | <b>2</b>  | 1  | Likely to be Carcinogenic to Humans | A3       | Known To Be Human Carcinogens                  | C  |
| 12035-72-2                     | nickel subsulfide                                                                                                         | <b>1A</b> | 1  | Carcinogenic to Humans              | A1       | Known To Be Human Carcinogens                  | NO |
| na                             | wood dusts                                                                                                                | <b>na</b> | 1  | na                                  | A1-A2-A4 | Known To Be Human Carcinogens                  | C  |
| 14808-60-7                     | quartz (SiO <sub>2</sub> )                                                                                                | <b>1A</b> | 1  | na                                  | A2       | Known To Be Human Carcinogens                  | C  |
| na                             | soot                                                                                                                      | <b>na</b> | 1  | na                                  | na       | Known To Be Human Carcinogens                  | NO |

**CAS:** Chemical Abstract Service Registry Number; **CLP:** Classification Labelling Packaging; **EPA:** Environmental Protection Agency (United States); **ACGIH:** American Conference of Governmental Industrial Hygienists (United States); **NTP:** National Toxicology Program (United States); **IARC:** International Agency for Research on Cancer; **NIOSH:** National Institute for Occupational Safety and Health (United States); C: carcinogen; NO: non carcinogen; Na: not available.





### PART 3: CoCs CONVERTED in CLP CoC

**Table S4. Conversion of IARC, EPA, ACGIH, NTP and NIOSH classification in the reference CLP CoC.**

| CAS                                                                                                   | CLP name                                                                                            | CLP       | IARC | EPA | ACGIH | NTP  | NIOSH |
|-------------------------------------------------------------------------------------------------------|-----------------------------------------------------------------------------------------------------|-----------|------|-----|-------|------|-------|
| 70-25-7                                                                                               | 1-methyl-3-nitro-1-nitrosoguanidine                                                                 | <b>1B</b> | 1B   | na  | na    | 1B/2 | NO    |
| 96-12-8                                                                                               | 1,2-dibromo-3-chloropropane                                                                         | <b>1B</b> | 1B/2 | na  | na    | 1B/2 | C     |
| 1746-01-6                                                                                             | 2,3,7,8-tetrachlorodibenzo[b,e][1,4]dioxin                                                          | <b>na</b> | 1A   | na  | na    | 1A   | C     |
| 71-43-2                                                                                               | benzene                                                                                             | <b>1A</b> | 1A   | 1A  | 1A    | 1A   | C     |
| 542-88-1                                                                                              | bis(chloromethyl) ether;<br>oxybis(chloromethane)                                                   | <b>1A</b> | 1A   | 1A  | 1A    | 1A   | C     |
| 12001-28-4;<br>132207-32-0;<br>12172-73-5;<br>77536-66-4;<br>77536-68-6;<br>77536-67-5;<br>12001-29-5 | Asbestos<br>[actinolite, amosite (grunerite),<br>antofillite, crisotilo, crocidolite,<br>tremolite] | <b>1A</b> | 1A   | 1A  | 1A    | 1A   | C     |
| 75-01-4                                                                                               | vinyl chloride; chloroethylene                                                                      | <b>1A</b> | 1A   | 1A  | 1A    | 1A   | C     |
| 1336-36-3                                                                                             | polychlorobiphenyls; PCB                                                                            | <b>na</b> | 1A   | 1B  | na    | 1B/2 | NO    |
| 106-89-8                                                                                              | 1-chloro-2,3-epoxypropane;<br>epichlorhydrin                                                        | <b>1B</b> | 1B   | 1B  | 2     | 1B/2 | C     |
| 50-00-0                                                                                               | formaldehyde                                                                                        | <b>1B</b> | 1A   | 1B  | 1A    | 1A   | C     |
| 50-32-8                                                                                               | benzo[a]pyrene; benzo[def]chrysene                                                                  | <b>1B</b> | 1A   | 1A  | 1B    | 1B/2 | C     |
| 75-21-8                                                                                               | ethylene oxide;<br>oxirane                                                                          | <b>1B</b> | 1A   | 1A  | 1B    | 1A   | C     |
| 127-18-4                                                                                              | tetrachloroethylene                                                                                 | <b>2</b>  | 1B   | 1B  | 2     | 1B/2 | C     |
| 1327-53-3                                                                                             | diarsenic trioxide; arsenic trioxide                                                                | <b>1A</b> | 1A   | 1A  | 1A    | 1A   | C     |
| 1303-28-2                                                                                             | diarsenic pentaoxide; arsenic<br>pentoxide; arsenic oxide                                           | <b>1A</b> | 1A   | 1A  | 1A    | 1A   | C     |
| na                                                                                                    | arsenic acid and its salts with the<br>exception of those specified<br>elsewhere in this Annex      | <b>1A</b> | 1A   | 1A  | 1A    | 1A   | C     |
| 107-06-2                                                                                              | 1,2-dichloroethane; ethylene<br>dichloride                                                          | <b>1B</b> | 1B/2 | 1B  | NO    | 1B/2 | C     |
| 101-14-4                                                                                              | 2,2'-dichloro-4,4'-<br>methylenedianiline; 4,4'-methylene<br>bis(2-chloroaniline)                   | <b>1B</b> | 1A   | na  | 1B    | 1B/2 | C     |
| 24613-89-6                                                                                            | dichromium tris(chromate);<br>chromium III chromate; chromic<br>chromate                            | <b>1B</b> | 1A   | 1A  | 1A    | 1A   | C     |
| 7789-06-2                                                                                             | strontium chromate                                                                                  | <b>1B</b> | 1A   | 1A  | 1A    | 1A   | C     |
| 11103-86-9                                                                                            | zinc chromates including zinc<br>potassium chromate                                                 | <b>1A</b> | 1A   | 1A  | 1A    | 1A   | C     |
| 98-87-3                                                                                               | $\alpha,\alpha$ -dichlorotoluene; benzylidene<br>chloride; benzal chloride                          | <b>2</b>  | 1B   | na  | na    | NO   | NO    |
| 100-44-7                                                                                              | $\alpha$ -chlorotoluene; benzyl chloride                                                            | <b>1B</b> | 1B   | 1B  | 2     | NO   | NO    |
| 98-88-4                                                                                               | benzoyl chloride                                                                                    | <b>na</b> | 1B   | na  | NO    | NO   | NO    |
| 53-70-3                                                                                               | dibenz[a,h]anthracene                                                                               | <b>1B</b> | 1B   | 1B  | na    | 1B/2 | C     |

|              |                                                                                                                                                                                                                                                                                                   |           |      |    |    |      |    |
|--------------|---------------------------------------------------------------------------------------------------------------------------------------------------------------------------------------------------------------------------------------------------------------------------------------------------|-----------|------|----|----|------|----|
| 191-30-0     | dibenzo[def,p]chrysene;<br>dibenzo[a,l]pyrene                                                                                                                                                                                                                                                     | <b>1B</b> | 1B   | na | na | 1B/2 | C  |
| 27208-37-3   | cyclopenta [c,d] pyrene                                                                                                                                                                                                                                                                           | <b>na</b> | 1B   | na | na | 1B   | C  |
| 90640-80-5   | anthracene oil; [A complex combination of polycyclic aromatic hydrocarbons obtained from coal tar having an approximate distillation range of 300 °C to 400 °C (572 °F to 752 °F). Composed primarily of phenanthrene, anthracene and carbazole.]                                                 | <b>1B</b> | NO   | na | na | 1B   | C  |
| 8001-58-9    | creosote; [The distillate of coal tar produced by the high temperature carbonization of bituminous coal. It consists primarily of aromatic hydrocarbons, tar acids and tar bases.]                                                                                                                | <b>1B</b> | 1B   | 1B | na | 1B   | C  |
| 12510-42-8   | erionite                                                                                                                                                                                                                                                                                          | <b>1A</b> | 1A   | na | na | 1A   | NO |
| 650-017-00-8 | RCF-Refractory Ceramic Fibres                                                                                                                                                                                                                                                                     | <b>1B</b> | 2    | 1B | 1B | 1B/2 | NO |
| 65996-93-2   | pitch, coal tar, high-temp.,; [The residue from the distillation of high temperature coal tar. A black solid with an approximate softening point from 30 °C to 180 °C (86 °F to 356 °F). Composed primarily of a complex mixture of three or more membered condensed ring aromatic hydrocarbons.] | <b>1A</b> | 1A   | na | 1A | 1A   | C  |
| 96-18-4      | 1,2,3-trichloropropane                                                                                                                                                                                                                                                                            | <b>1B</b> | 1B   | 1B | na | 1B/2 | C  |
| 121-14-2     | 2,4-dinitrotoluene [1]<br>dinitrotoluene [2]                                                                                                                                                                                                                                                      | <b>1B</b> | 1B/2 | na | na | NO   | C  |
| 106-99-0     | 1,3-butadiene; buta-1,3-diene                                                                                                                                                                                                                                                                     | <b>1A</b> | 1A   | 1A | 1B | 1A   | NO |
| 106-97-8     | butane (containing ≥ 0,1 % butadiene (203-450-8))                                                                                                                                                                                                                                                 | <b>1A</b> | NO   | na | na | NO   | NO |
| 75-28-5      | isobutane (containing ≥ 0,1 % butadiene (203-450-8))                                                                                                                                                                                                                                              | <b>1A</b> | NO   | na | na | NO   | NO |
| 101-77-9     | 4,4'-diaminodiphenylmethane; 4,4'-methylenedianiline                                                                                                                                                                                                                                              | <b>1B</b> | 1B/2 | na | 2  | 1B/2 | NO |
| 79-06-1      | acrylamide; prop-2-enamide                                                                                                                                                                                                                                                                        | <b>1B</b> | 1B   | 1B | 1B | 1B/2 | C  |
| 593-60-2     | bromoethylene                                                                                                                                                                                                                                                                                     | <b>1B</b> | 1B   | na | 1B | 1B/2 | C  |
| 119-90-4     | 3,3'-dimethoxybenzidine; o-dianisidine                                                                                                                                                                                                                                                            | <b>1B</b> | 1B/2 | na | na | 1B/2 | C  |
| 2425-06-1    | captafol (ISO); 1,2,3,6-tetrahydro-N-(1,1,2,2-tetrachloroethylthio)phthalimide                                                                                                                                                                                                                    | <b>1B</b> | 1B   | na | 2  | 1B/2 | C  |
| 77-78-1      | dimethyl sulphate                                                                                                                                                                                                                                                                                 | <b>1B</b> | 1B   | 1B | 2  | 1B/2 | C  |
| 79-44-7      | dimethylcarbamoyl chloride                                                                                                                                                                                                                                                                        | <b>1B</b> | 1B   | na | 1B | 1B/2 | C  |
| 75-02-5      | fluoroethylene                                                                                                                                                                                                                                                                                    | <b>1B</b> | 1B   | na | 1B | 1B/2 | NO |
| 556-52-5     | 2,3-epoxypropan-1-ol; glycidol; oxiranemethanol                                                                                                                                                                                                                                                   | <b>1B</b> | 1B   | na | 2  | 1B/2 | NO |
| 96-09-3      | styrene oxide; (epoxyethyl)benzene; phenyloxirane                                                                                                                                                                                                                                                 | <b>1B</b> | 1B   | na | 2  | 1B/2 | NO |
| 79-01-6      | trichloroethylene; trichloroethene                                                                                                                                                                                                                                                                | <b>1B</b> | 1A   | 1A | 1B | 1A   | C  |

|                       |                                                                                                                                                                |           |    |    |    |      |    |
|-----------------------|----------------------------------------------------------------------------------------------------------------------------------------------------------------|-----------|----|----|----|------|----|
| 126-72-7              | tris(2,3-dibromopropyl) phosphate                                                                                                                              | <b>1B</b> | 1B | na | na | 1B/2 | NO |
| 7758-97-6             | lead chromate                                                                                                                                                  | <b>1B</b> | 1A | 1A | 1A | 1A   | C  |
| 1344-37-2             | lead sulfochromate yellow; C.I. Pigment Yellow 34; [This substance is identified in the Colour Index by Colour Index Constitution Number, C.I. 77603.]         | <b>1B</b> | 1A | 1A | 1A | 1A   | C  |
| 12656-85-8            | lead chromate molybdate sulfate red; C.I. Pigment Red 104; [This substance is identified in the Colour Index by Colour Index Constitution Number, C.I. 77605.] | <b>1B</b> | 1A | 1A | 1A | 1A   | C  |
| 1333-82-0             | chromium (VI) trioxide                                                                                                                                         | <b>1A</b> | 1A | 1A | 1A | 1A   | C  |
| na                    | acids generated from chromium trioxide and their oligomers                                                                                                     | <b>1A</b> | 1A | 1A | 1A | 1A   | C  |
| na                    | oligomers of chromic acid and dichromic acid                                                                                                                   | <b>1A</b> | 1A | 1A | 1A | 1A   | C  |
| 7738-94-5             | chromic acid                                                                                                                                                   | <b>1B</b> | 1A | 1A | 1A | 1A   | C  |
| 13530-68-2            | dichromic acid                                                                                                                                                 | <b>1B</b> | 1A | 1A | 1A | 1A   | C  |
| 10588-01-9, 7789-12-0 | sodium dichromate                                                                                                                                              | <b>1B</b> | 1A | 1A | 1A | 1A   | C  |
| 7778-50-9             | potassium dichromate                                                                                                                                           | <b>1B</b> | 1A | 1A | 1A | 1A   | C  |
| 7789-09-5             | ammonium dichromate                                                                                                                                            | <b>1B</b> | 1A | 1A | 1A | 1A   | C  |
| 7789-00-6             | potassium chromate                                                                                                                                             | <b>1B</b> | 1A | 1A | 1A | 1A   | C  |
| 7775-11-3             | sodium chromate                                                                                                                                                | <b>1B</b> | 1A | 1A | 1A | 1A   | C  |
| 234-329-8             | potassium hydroxyoctaoxodizincatedichromate                                                                                                                    | <b>1A</b> | 1A | 1A | 1A | 1A   | C  |
| 49663-84-5            | pentazinc chromate octahydroxide                                                                                                                               | <b>1A</b> | 1A | 1A | 1A | 1A   | C  |
| 95-53-4               | o-toluidine; 2-aminotoluene                                                                                                                                    | <b>1B</b> | 1A | na | 2  | 1A   | C  |
| 95-69-2               | 4-chloro-o-toluidine [1]<br>4-chloro-o-toluidine hydrochloride [2]                                                                                             | <b>1B</b> | 1B | na | na | 1B/2 | NO |
| 92-87-5               | benzidine; 1,1'-biphenyl-4,4'-diamine; 4,4'-diaminobiphenyl; biphenyl-4,4'-ylenediamine                                                                        | <b>1A</b> | 1A | 1A | 1A | 1A   | C  |
| 91-59-8               | 2-naphthylamine                                                                                                                                                | <b>1A</b> | 1A | na | 1A | 1A   | C  |
| 92-67-1               | biphenyl-4-ylamine; xenylamine; 4-aminobiphenyl                                                                                                                | <b>1A</b> | 1A | na | 1A | 1A   | C  |
| 12070-12-1            | tungsten carbide                                                                                                                                               | <b>na</b> | 1B | na | 1B | 1B/2 | NO |
| 7440-48-4             | cobalt                                                                                                                                                         | <b>1B</b> | 1B | na | 2  | 1B/2 | NO |
| 7440-38-2             | arsenic                                                                                                                                                        | <b>1A</b> | 1A | 1A | 1A | 1A   | C  |
| na                    | arsenic compounds, with the exception of those specified elsewhere in ANNEX VI CLP-ATP 18                                                                      | <b>na</b> | 1A | 1A | 1B | 1A   | C  |
| 7440-41-7             | beryllium                                                                                                                                                      | <b>1B</b> | 1A | 1B | 1A | 1A   | C  |
| na                    | beryllium compounds with the exception of aluminium beryllium silicates, and with those specified elsewhere in this Annex                                      | <b>1B</b> | 1A | 1B | 1B | 1A   | C  |

|                                |                                                                    |           |      |    |    |      |    |
|--------------------------------|--------------------------------------------------------------------|-----------|------|----|----|------|----|
| 7440-43-9                      | cadmium (pyrophoric)                                               | <b>1B</b> | 1A   | 1B | 1B | 1A   | C  |
| 7440-43-9 [1]<br>1306-19-0 [2] | cadmium (non-pyrophoric) [1]<br>cadmium oxide (non-pyrophoric) [2] | <b>1B</b> | 1A   | 1B | 1B | 1A   | C  |
| 7440-02-0                      | nickel                                                             | <b>2</b>  | 1B/2 | NO | NO | 1B/2 | C  |
| 13463-39-3                     | tetracarbonylnickel; nickel<br>tetracarbonyl                       | <b>2</b>  | 1A   | 1B | 2  | 1A   | C  |
| 12035-72-2                     | nickel subsulfide                                                  | <b>1A</b> | 1A   | 1A | 1A | 1A   | C  |
| na                             | wood powder                                                        | <b>na</b> | 1A   | na | 1A | 1A   | C  |
| 14808-60-7                     | quartz (SiO <sub>2</sub> )                                         | <b>1A</b> | 1A   | na | 1B | 1A   | C  |
| na                             | soot                                                               | <b>na</b> | 1A   | na | na | 1A   | NO |

**CAS:** Chemical Abstract Service Registry Number; **CLP:** Classification Labelling Packaging; **EPA:** Environmental Protection Agency (United States); **ACGIH:** American Conference of Governmental Industrial Hygienists (United States); **NTP:** National Toxicology Program (United States); **IARC:** International Agency for Research on Cancer; **NIOSH:** National Institute for Occupational Safety and Health (United States); C: carcinogen; NO: non carcinogen; Na: not available.

## PART 4: GROUPS OF RESULTS

**Table S5. 23 cases classified with concordance in all the classifications. In red, cases where were not used specific CAS, but CAS referred to a group of compounds.**

| CAS                                                                                                   | CLP name                                                                                      | Note                                                                                                               |
|-------------------------------------------------------------------------------------------------------|-----------------------------------------------------------------------------------------------|--------------------------------------------------------------------------------------------------------------------|
| 1746-01-6                                                                                             | 2,3,7,8-tetrachlorodibenzo[b,e][1,4]dioxin                                                    | CLP, EPA, AGIH classification not available                                                                        |
| 71-43-2                                                                                               | benzene                                                                                       | -                                                                                                                  |
| 542-88-1                                                                                              | bis(chloromethyl) ether; oxybis (chloromethane)                                               | -                                                                                                                  |
| 12001-28-4;<br>132207-32-0;<br>12172-73-5;<br>77536-66-4;<br>77536-68-6;<br>77536-67-5;<br>12001-29-5 | Asbestos<br>[actinolite, amosite (grunerite), antofillite, crisotilo, crocidolite, tremolite] | -                                                                                                                  |
| 75-01-4                                                                                               | vinyl chloride; chloroethylene                                                                | -                                                                                                                  |
| 1327-53-3                                                                                             | diarsenic trioxide; arsenic trioxide                                                          | if not found, we have decided to use the classification of arsenic and its inorganic compounds                     |
| 1303-28-2                                                                                             | diarsenic pentaoxide; arsenic pentoxide; arsenic oxide                                        | if not found, we have decided to use the classification of arsenic and its inorganic compounds                     |
| na                                                                                                    | arsenic acid and its salts with the exception of those specified elsewhere in this Annex      | if not found, we have decided to use the classification of arsenic and its inorganic compounds                     |
| 11103-86-9                                                                                            | zinc chromates including zinc potassium chromate                                              | if not found, we have decided to use the classification of hexavalent chromium group                               |
| 27208-37-3                                                                                            | cyclopenta [c,d] pyrene                                                                       | CLP, EPA, AGIH classification not available;<br>if not found, we can consider it as Coal Tars and Coal-Tar Pitches |
| 8001-58-9                                                                                             | creosote*                                                                                     | ACGIH classification not available;<br>if not found, we can consider it as Coal Tars and Coal-Tar Pitches          |
| 65996-93-2                                                                                            | pitch, coal tar, high-temp.**                                                                 | EPA classification not available                                                                                   |
| 1333-82-0                                                                                             | chromium (VI) trioxide                                                                        | if not found, we have decided to use the classification of hexavalent chromium group                               |
| na                                                                                                    | acids generated from chromium trioxide and their oligomers                                    | if not found, we have decided to use the classification of hexavalent chromium group                               |
| na                                                                                                    | oligomers of chromic acid and dichromic acid                                                  | if not found, we have decided to use the classification of hexavalent chromium group                               |
| 234-329-8                                                                                             | potassium hydroxyoctaoxodizincatedichromate                                                   | if not found, we have decided to use the classification of hexavalent chromium group                               |
| 49663-84-5                                                                                            | pentazinc chromate octahydroxide                                                              | if not found, we have decided to use the classification of hexavalent chromium group                               |
| 92-87-5                                                                                               | benzidine; 1,1'-biphenyl-4,4'-diamine; 4,4'-diaminobiphenyl; biphenyl-4,4'-ylenediamine       | -                                                                                                                  |

|            |                                 |                                                                        |
|------------|---------------------------------|------------------------------------------------------------------------|
| 91-59-8    | 2-naphthylamine                 | EPA classification not available                                       |
| 92-67-1    | biphenyl-4-ylamine; xenylamine; | 4- EPA classification not available                                    |
| 7440-38-2  | arsenic                         | -                                                                      |
| 12035-72-2 | nickel subsulfide               | if not found, we can consider Nickel metal and other compounds (as Ni) |
| na         | wood powder                     | EPA classification not available                                       |

\* The distillate of coal tar produced by the high temperature carbonization of bituminous coal. It consists primarily of aromatic hydrocarbons, tar acids and tar bases.

\*\* The residue from the distillation of high temperature coal tar. A black solid with an approximate softening point from 30 °C to 180 °C (86 °F to 356 °F). Composed primarily of a complex mixture of three or more membered condensed ring aromatic hydrocarbons.

**CAS:** Chemical Abstract Service Registry Number; **CLP:** Classification Labelling Packaging; **EPA:** Environmental Protection Agency (United States); **ACGIH:** American Conference of Governmental Industrial Hygienists (United States); **NTP:** National Toxicology Program (United States); **IARC:** International Agency for Research on Cancer; **NIOSH:** National Institute for Occupational Safety and Health (United States); Na: not available.

**Table S6. 60 cases that have at least one discordant classification.**

| CAS          | CLP name                                                                   |
|--------------|----------------------------------------------------------------------------|
| 70-25-7      | 1-methyl-3-nitro-1-nitrosoguanidine                                        |
| 96-12-8      | 1,2-dibromo-3-chloropropane                                                |
| 1336-36-3    | polychlorobiphenyls; PCB                                                   |
| 106-89-8     | 1-chloro-2,3-epoxypropane; epichlorhydrin                                  |
| 50-00-0      | formaldehyde                                                               |
| 50-32-8      | benzo[a]pyrene; benzo[def]chrysene                                         |
| 75-21-8      | ethylene oxide; oxirane                                                    |
| 127-18-4     | tetrachloroethylene                                                        |
| 107-06-2     | 1,2-dichloroethane; ethylene dichloride                                    |
| 101-14-4     | 2,2'-dichloro-4,4'-methylenedianiline; 4,4'-methylene bis(2-chloroaniline) |
| 24613-89-6   | dichromium tris(chromate); chromium III chromate; chromic chromate         |
| 7789-06-2    | strontium chromate                                                         |
| 98-87-3      | $\alpha,\alpha$ -dichlorotoluene; benzylidene chloride; benzal chloride    |
| 100-44-7     | $\alpha$ -chlorotoluene; benzyl chloride                                   |
| 98-88-4      | benzoyl chloride                                                           |
| 53-70-3      | dibenz[a,h]anthracene                                                      |
| 191-30-0     | dibenzo[def,p]chrysene; dibenzo[a,l]pyrene                                 |
| 90640-80-5   | anthracene oil *                                                           |
| 12510-42-8   | erionite                                                                   |
| 650-017-00-8 | RCF-Refractory Ceramic Fibres                                              |
| 96-18-4      | 1,2,3-trichloropropane                                                     |
| 121-14-2     | 2,4-dinitrotoluene<br>dinitrotoluene [2]                                   |

[1]

|                       |                                                                                                                           |     |
|-----------------------|---------------------------------------------------------------------------------------------------------------------------|-----|
| 106-99-0              | 1,3-butadiene; buta-1,3-diene                                                                                             |     |
| 106-97-8              | butane (containing $\geq 0,1$ % butadiene (203-450-8))                                                                    |     |
| 75-28-5               | isobutane (containing $\geq 0,1$ % butadiene (203-450-8))                                                                 |     |
| 101-77-9              | 4,4'-diaminodiphenylmethane; 4,4'-methylenedianiline                                                                      |     |
| 79-06-1               | acrylamide; prop-2-enamide                                                                                                |     |
| 593-60-2              | bromoethylene                                                                                                             |     |
| 119-90-4              | 3,3'-dimethoxybenzidine; o-dianisidine                                                                                    |     |
| 2425-06-1             | captafol (ISO); 1,2,3,6-tetrahydro-N-(1,1,2,2-tetrachloroethylthio)phthalimide                                            |     |
| 77-78-1               | dimethyl sulphate                                                                                                         |     |
| 79-44-7               | dimethylcarbamoyl chloride                                                                                                |     |
| 75-02-5               | fluoroethylene                                                                                                            |     |
| 556-52-5              | 2,3-epoxypropan-1-ol; glycidol; oxiranemethanol                                                                           |     |
| 96-09-3               | styrene oxide; (epoxyethyl)benzene; phenyloxirane                                                                         |     |
| 79-01-6               | trichloroethylene; trichloroethene                                                                                        |     |
| 126-72-7              | tris(2,3-dibromopropyl) phosphate                                                                                         |     |
| 7758-97-6             | lead chromate                                                                                                             |     |
| 1344-37-2             | lead sulfochromate yellow; C.I. Pigment Yellow 34**                                                                       |     |
| 12656-85-8            | lead chromate molybdate sulfate red; C.I. Pigment Red 104 ***                                                             |     |
| 7738-94-5             | chromic acid                                                                                                              |     |
| 13530-68-2            | dichromic acid                                                                                                            |     |
| 10588-01-9, 7789-12-0 | sodium dichromate                                                                                                         |     |
| 7778-50-9             | potassium dichromate                                                                                                      |     |
| 7789-09-5             | ammonium dichromate                                                                                                       |     |
| 7789-00-6             | potassium chromate                                                                                                        |     |
| 7775-11-3             | sodium chromate                                                                                                           |     |
| 95-53-4               | o-toluidine; 2-aminotoluene                                                                                               |     |
| 95-69-2               | 4-chloro-o-toluidine [1]<br>4-chloro-o-toluidine hydrochloride [2]                                                        |     |
| 12070-12-1            | tungsten carbide                                                                                                          |     |
| 7440-48-4             | cobalt                                                                                                                    |     |
| na                    | arsenic compounds, with the exception of those specified elsewhere in ANNEX VI CLP-ATP 18                                 |     |
| 7440-41-7             | beryllium                                                                                                                 |     |
| na                    | beryllium compounds with the exception of aluminium beryllium silicates, and with those specified elsewhere in this Annex |     |
| 7440-43-9             | cadmium (pyrophoric)                                                                                                      |     |
| 7440-43-9 [1]         | cadmium (non-pyrophoric)                                                                                                  | [1] |
| 1306-19-0 [2]         | cadmium oxide (non-pyrophoric) [2]                                                                                        |     |
| 7440-02-0             | nickel                                                                                                                    |     |
| 13463-39-3            | tetracarbonylnickel; nickel tetracarbonyl                                                                                 |     |
| 14808-60-7            | quartz (SiO <sub>2</sub> )                                                                                                |     |
| na                    | soot                                                                                                                      |     |



---

\* A complex combination of polycyclic aromatic hydrocarbons obtained from coal tar having an approximate distillation range of 300 °C to 400 °C (572 °F to 752 °F). Composed primarily of phenanthrene, anthracene and carbazole.

\*\* This substance is identified in the Colour Index by Colour Index Constitution Number, C.I. 77603.

\*\*\* This substance is identified in the Colour Index by Colour Index Constitution Number, C.I. 77605.

**CAS:** Chemical Abstract Service Registry Number; **CLP:** Classification Labelling Packaging; Na: not available.

**Table S7. Case data for groups of compounds.**

| <b>CAS</b>               | <b>Nome CLP</b>                                                                                                                                                                                                                                   | <b>Group of compounds</b>      |
|--------------------------|---------------------------------------------------------------------------------------------------------------------------------------------------------------------------------------------------------------------------------------------------|--------------------------------|
| 50-32-8                  | benzo[a]pyrene; benzo[def]chrysene                                                                                                                                                                                                                | Coal Tars and Coal-Tar Pitches |
| 1327-53-3                | diarsenic trioxide; arsenic trioxide                                                                                                                                                                                                              | Arsenic                        |
| 1303-28-2                | diarsenic pentaoxide; arsenic pentoxide; arsenic oxide                                                                                                                                                                                            | Arsenic                        |
| na                       | arsenic acid and its salts with the exception of those specified elsewhere in this Annex                                                                                                                                                          | Arsenic                        |
| 24613-89-6               | dichromium tris(chromate); chromium III chromate; chromic chromate                                                                                                                                                                                | Chromium                       |
| 7789-06-2                | strontium chromate                                                                                                                                                                                                                                | Chromium                       |
| 11103-86-9               | zinc chromates including zinc potassium chromate                                                                                                                                                                                                  | Chromium                       |
| 53-70-3                  | dibenz[a,h]anthracene                                                                                                                                                                                                                             | Coal Tars and Coal-Tar Pitches |
| 191-30-0                 | dibenzo[def,p]chrysene; dibenzo[a,l]pyrene                                                                                                                                                                                                        | Coal Tars and Coal-Tar Pitches |
| 27208-37-3               | cyclopenta [c,d] pyrene                                                                                                                                                                                                                           | Coal Tars and Coal-Tar Pitches |
| 90640-80-5               | anthracene oil; [A complex combination of polycyclic aromatic hydrocarbons obtained from coal tar having an approximate distillation range of 300 °C to 400 °C (572 °F to 752 °F). Composed primarily of phenanthrene, anthracene and carbazole.] | Coal Tars and Coal-Tar Pitches |
| 8001-58-9                | creosote; [The distillate of coal tar produced by the high temperature carbonization of bituminous coal. It consists primarily of aromatic hydrocarbons, tar acids and tar bases.]                                                                | Coal Tars and Coal-Tar Pitches |
| 7758-97-6                | lead chromate                                                                                                                                                                                                                                     | Chromium                       |
| 1344-37-2                | lead sulfochromate yellow; C.I. Pigment Yellow 34; [This substance is identified in the Colour Index by Colour Index Constitution Number, C.I. 77603.]                                                                                            | Chromium                       |
| 12656-85-8               | lead chromate molybdate sulfate red; C.I. Pigment Red 104; [This substance is identified in the Colour Index by Colour Index Constitution Number, C.I. 77605.]                                                                                    | Chromium                       |
| 1333-82-0                | chromium (VI) trioxide                                                                                                                                                                                                                            | Chromium                       |
| na                       | acids generated from chromium trioxide and their oligomers                                                                                                                                                                                        | Chromium                       |
| na                       | oligomers of chromic acid and dichromic acid                                                                                                                                                                                                      | Chromium                       |
| 7738-94-5                | chromic acid                                                                                                                                                                                                                                      | Chromium                       |
| 13530-68-2               | dichromic acid                                                                                                                                                                                                                                    | Chromium                       |
| 10588-01-9,<br>7789-12-0 | sodium dichromate                                                                                                                                                                                                                                 | Chromium                       |
| 7778-50-9                | potassium dichromate                                                                                                                                                                                                                              | Chromium                       |
| 7789-09-5                | ammonium dichromate                                                                                                                                                                                                                               | Chromium                       |
| 7789-00-6                | potassium chromate                                                                                                                                                                                                                                | Chromium                       |
| 7775-11-3                | sodium chromate                                                                                                                                                                                                                                   | Chromium                       |
| 234-329-8                | potassium hydroxyoctaoxodizincatedichromate                                                                                                                                                                                                       | Chromium                       |
| 49663-84-5               | pentazinc chromate octahydroxide                                                                                                                                                                                                                  | Chromium                       |
| 13463-39-3               | tetracarbonylnickel; nickel tetracarbonyl                                                                                                                                                                                                         | Nickel                         |
| 12035-72-2               | nickel subsulfide                                                                                                                                                                                                                                 | Nickel                         |

**CAS:** Chemical Abstract Service Registry Number; **CLP:** Classification Labelling Packaging; **Na:** not available.

**Table S8 . CLP COC and IARC, EPA, ACGIH, NTP, NIOSH converted CoCs of Butane and Isobutane.**

| CAS      | CLP Name                                                        | CLP | IARC | EPA  | ACGIH | NTP | NIOSH |
|----------|-----------------------------------------------------------------|-----|------|------|-------|-----|-------|
| 106-97-8 | Butane                                                          | NO  |      |      |       |     |       |
| 106-97-8 | Butane<br>(containing $\geq 0,1$ %<br>butadiene (203-450-8))    | 1A  | NO   | n.a. | n.a.  | NO  | NO    |
|          | Isobutane                                                       | NO  |      |      |       |     |       |
| 75-28-5  | Isobutane<br>(containing $\geq 0,1$ %<br>butadiene (203-450-8)) | 1A  | NO   | n.a. | n.a.  | NO  | NO    |

**CAS:** Chemical Abstract Service Registry Number ; **CLP:** Classification Labelling Packaging; **IARC:** International Agency for Research on Cancer; **EPA:** Environmental Protection Agency (United States); **NTP:** National Toxicology Program (United States); **ACGIH:** American Conference of Governmental Industrial Hygienists (United States); **NIOSH:** National Institute for Occupational Safety and Health (United States); NO: non carcinogen; n.a.: not available

**Table S9. case history of cluster 3.**

| Agency | CAS        | Name                              | CoC |
|--------|------------|-----------------------------------|-----|
| NTP    | 65996-93-2 | pitch, coal tar, high-temperature | NO  |
|        | 8007-45-2  |                                   | 1A  |
| NIOSH  | 65996-93-2 | cadmium (pyrophoric)              | NO  |
|        |            | cadmium dust                      | C   |

**CAS:** Chemical Abstract Service Registry Number; **NTP:** National Toxicology Program (United States); **NIOSH:** National Institute for Occupational Safety and Health (United States); NO: non carcinogen.

Table S10. Cluster 4, divisions

| Case data 4.1: not present in the NIOSH list, other documentation is available, but it is not conclusive.                                                                                                                 |                                                                |                                                                                                                                           |
|---------------------------------------------------------------------------------------------------------------------------------------------------------------------------------------------------------------------------|----------------------------------------------------------------|-------------------------------------------------------------------------------------------------------------------------------------------|
| CAS                                                                                                                                                                                                                       | CLP name                                                       | added documentation                                                                                                                       |
| 1336-36-3                                                                                                                                                                                                                 | polychlorobiphenyls; PCB                                       | <a href="https://www.cdc.gov/niosh/docs/86-111/default.html">https://www.cdc.gov/niosh/docs/86-111/default.html</a>                       |
| 12510-42-8                                                                                                                                                                                                                | erionite                                                       | <a href="https://blogs.cdc.gov/niosh-science-blog/2011/11/22/erionite/">https://blogs.cdc.gov/niosh-science-blog/2011/11/22/erionite/</a> |
| 650-017-00-8                                                                                                                                                                                                              | RCF-Refractory Ceramic Fibres                                  | <a href="https://www.cdc.gov/niosh/updates/upd-06-12-06.html">https://www.cdc.gov/niosh/updates/upd-06-12-06.html</a>                     |
| Cluster 4.2: not present in the NIOSH list, these cases have added documentations, but not for the carcinogenicity.                                                                                                       |                                                                |                                                                                                                                           |
| CAS                                                                                                                                                                                                                       | CLP name                                                       |                                                                                                                                           |
| 75-02-5                                                                                                                                                                                                                   | Fluoroethylene                                                 |                                                                                                                                           |
| 556-52-5                                                                                                                                                                                                                  | 2,3-epoxypropan-1-ol; glycidol; oxiranemethanol                |                                                                                                                                           |
| 100-44-7                                                                                                                                                                                                                  | $\alpha$ -chlorotoluene; benzyl chloride                       |                                                                                                                                           |
| Cluster 4.3: not present in the NIOSH list and we have not found other NIOSH documentations.                                                                                                                              |                                                                |                                                                                                                                           |
| CAS                                                                                                                                                                                                                       | CLP name                                                       |                                                                                                                                           |
| 70-25-7                                                                                                                                                                                                                   | 1-methyl-3-nitro-1-nitrosoguanidine                            |                                                                                                                                           |
| 98-88-4                                                                                                                                                                                                                   | benzoyl chloride                                               |                                                                                                                                           |
| 96-09-3                                                                                                                                                                                                                   | styrene oxide; (epoxyethyl)benzene; phenyloxirane              |                                                                                                                                           |
| 126-72-7                                                                                                                                                                                                                  | tris(2,3-dibromopropyl) phosphate                              |                                                                                                                                           |
| 95-69-2                                                                                                                                                                                                                   | 4-chloro-o-toluidine<br>4-chloro-o-toluidine hydrochloride [2] | [1]                                                                                                                                       |
| 12070-12-1                                                                                                                                                                                                                | tungsten carbide                                               |                                                                                                                                           |
| 7440-48-4                                                                                                                                                                                                                 | cobalt                                                         |                                                                                                                                           |
| n.a.                                                                                                                                                                                                                      | soot                                                           |                                                                                                                                           |
| Cluster 4.4: not present in the NTP RoC list and/or we have not found other NTP documentations on occupational field.                                                                                                     |                                                                |                                                                                                                                           |
| CAS                                                                                                                                                                                                                       | CLP name                                                       |                                                                                                                                           |
| 121-14-2                                                                                                                                                                                                                  | 2,4-dinitrotoluene [1]; dinitrotoluene [2]                     |                                                                                                                                           |
| 100-44-7                                                                                                                                                                                                                  | $\alpha$ -chlorotoluene; benzyl chloride                       |                                                                                                                                           |
| CAS: Chemical Abstract Service Registry Number ; CLP: Classification Labelling Packaging; NTP: National Toxicology Program (United States); NIOSH: National Institute for Occupational Safety and Health (United States). |                                                                |                                                                                                                                           |

Table S11. CoCs – CLP converted of PCBs (PolyChlorinated Biphenyls), RCF (Refractory Ceramic Fibres) and erionite.

| CAS          | Name                            | CLP  | IARC | EPA  | ACGIH | NTP  | NIOSH |
|--------------|---------------------------------|------|------|------|-------|------|-------|
| 1336-36-3    | Polychlorobiphenyls (PCB)       | n.a. | 1A   | 1B   | n.a.  | 1B/2 | NO    |
| 12510-42-8   | Erionite                        | 1A   | 1A   | n.a. | n.a.  | 1A   | NO    |
| 650-017-00-8 | Refractory Ceramic Fibres (RCF) | 1B   | 2    | 1B   | 1B    | 1B/2 | NO    |

CAS: Chemical Abstract Service Registry Number; CLP: Classification Labelling Packaging; IARC: International Agency for Research on Cancer; EPA: Environmental Protection Agency (United States); ACGIH: American Conference of Governmental Industrial Hygienists (United States); NTP: National Toxicology Program (United States); NIOSH: National Institute for Occupational Safety and Health (United States); NO: non carcinogen; n.a.: not available
